# Supplementary material
Source: Royal Society of Chemistry journal article supplement (doi:10.1039/d6dt00992a)
Supplement: d6dt00992a1.pdf [file d6dt00992a1.pdf]

## Polymorphic $\text{LiZnSbO}_4$ with orthorhombic and monoclinic phases for efficient photocatalytic degradation of wastewater

Guoguang Yao<sup>a</sup>, Qianjing Jia<sup>a</sup>, Fanfan Pan<sup>a</sup>, Li Quan<sup>a</sup>, Cuijin Pei<sup>a,\*</sup>, Shaofei Song<sup>b</sup>, Yanmin Jia<sup>c,\*</sup>

<sup>a</sup> School of Science, Xi'an University of Posts and Telecommunications, Xi'an 710121, China

<sup>b</sup> Department of Applied Chemistry, Yuncheng University, Yuncheng 044000

<sup>c</sup> School of Physics and Information Technology, Shaanxi Normal University, Xi'an 710119, China

Corresponding authors: yaoguoguang@xupt.edu.cn, [ymjia@snnu.edu.cn](mailto:ymjia@snnu.edu.cn)

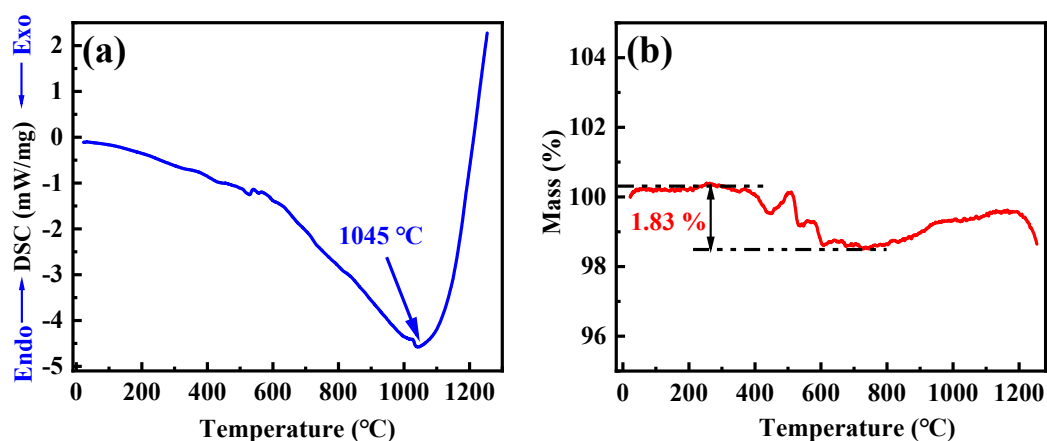

Fig. S1 DSC (a) and TG (b) curves of  $\text{LiZnSbO}_4$  mixture powders.

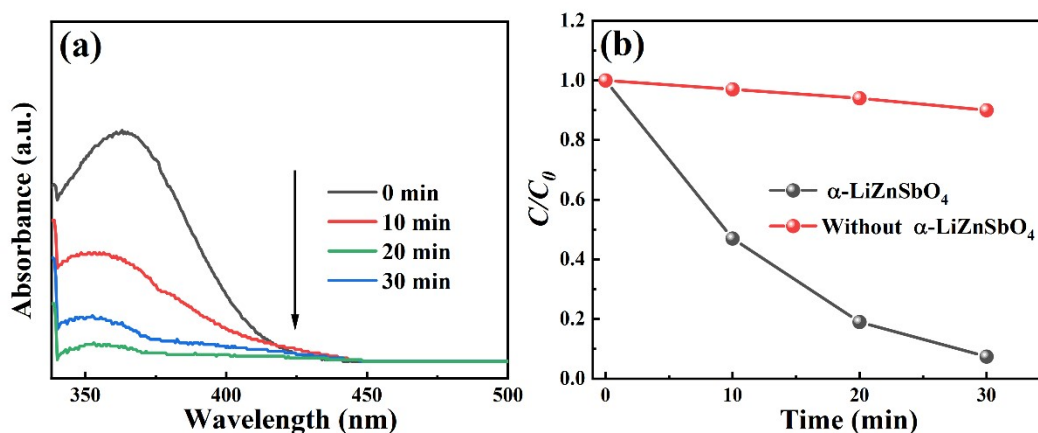

Fig. S2 UV-vis spectral changes of TC solutions, (b) degradation curves of photocatalytic degradation of TC.

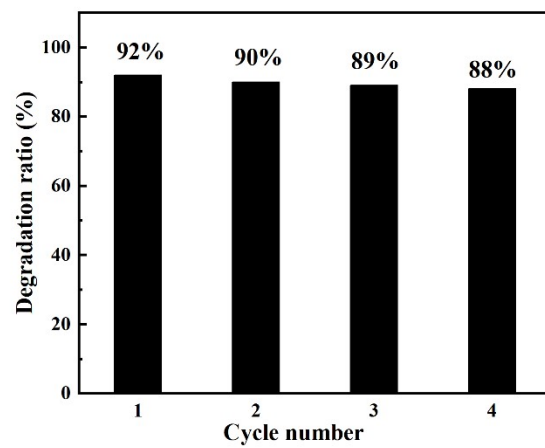

Fig. S3 The reusability tests of  $\alpha$ -LiZnSbO<sub>4</sub> catalysts.
